# Supplementary material
Source: Research Square preprint supplement (doi:10.21203/rs.3.rs-9227072/v1)
Supplement: Supplementary file 1 [file 0c60d36c9b5021575e85cbb4.docx]

Supporting Information

**Exploratory Serum Mass Spectral Fingerprinting and Machine Learning for Case-Control Classification of Preeclampsia**

Laura Maca1, Luisa Amezquita2, Yuly Andrea Prada*3, Claudia Colmenares-Mejía4,5 , Doris Quintero-Lesmes4, Paula Bautista-Niño4, Norma Serrano4, Enrique Mejía-Ospino3.

1Universidad del Cauca, Popayán, Colombia

2Universidad Pedagógica y Tecnológica de Colombia (UPTC), Tunja, Colombia

3Universidad Industrial de Santander. Laboratorio de Espectroscopia Atómica y Molecular (LEAM). Parque Tecnológico Guatiguara. Piedecuesta, Santander, Colombia.

4Research Centre, Fundación Cardiovascular de Colombia (FCV), Hospital Internacional de Colombia, Valle de Menzuly Km 7, Piedecuesta, Santander, Colombia

5Universidad del Valle. Escuela de Ciencias Básicas. Facultad de Salud, Posgrado en Ciencias Biomédicas, Cali, Colombia..

**Table S1.** Labels for case and control sample with the MALDI spectral data reservoir is available at <https://github.com/YAPrada/MALDI-Data-Preeclampsia>.

**Labels for case and control samples**

| **Sample ID** | **Case** |  | **Sample ID** | **Case** |
| --- | --- | --- | --- | --- |
| 1 | no |  | 84 | no |
| 2 | no |  | 85 | no |
| 3 | no |  | 86 | no |
| 4 | no |  | 87 | no |
| 5 | no |  | 88 | yes |
| 6 | no |  | 89 | no |
| 7 | no |  | 90 | no |
| 8 | no |  | 91 | no |
| 9 | no |  | 92 | yes |
| 10 | no |  | 93 | yes |
| 11 | yes |  | 94 | no |
| 12 | no |  | 95 | yes |
| 13 | no |  | 96 | no |
| 14 | no |  | 97 | yes |
| 15 | yes |  | 98 | no |
| 16 | no |  | 99 | no |
| 17 | yes |  | 100 | no |
| 18 | no |  | 101 | yes |
| 19 | yes |  | 102 | yes |
| 20 | no |  | 103 | yes |
| 21 | no |  | 104 | yes |
| 22 | no |  | 105 | yes |
| 23 | no |  | 106 | yes |
| 24 | yes |  | 107 | yes |
| 25 | yes |  | 108 | yes |
| 26 | no |  | 109 | yes |
| 27 | no |  | 110 | yes |
| 28 | no |  | 111 | yes |
| 29 | no |  | 112 | yes |
| 30 | no |  | 113 | yes |
| 31 | no |  | 114 | yes |
| 32 | no |  | 115 | yes |
| 33 | yes |  | 116 | yes |
| 34 | yes |  | 117 | no |
| 35 | no |  | 118 | yes |
| 36 | no |  | 119 | no |
| 37 | no |  | 120 | yes |
| 38 | no |  | 121 | yes |
| 39 | no |  | 122 | no |
| 40 | yes |  | 123 | no |
| 41 | yes |  | 124 | no |
| 42 | yes |  | 125 | yes |
| 43 | no |  | 126 | no |
| 44 | no |  | 127 | no |
| 45 | yes |  | 128 | no |
| 46 | yes |  | 129 | no |
| 47 | no |  | 130 | no |
| 48 | yes |  | 131 | yes |
| 49 | no |  | 132 | yes |
| 50 | yes |  | 133 | no |
| 51 | no |  | 134 | no |
| 52 | no |  | 135 | no |
| 53 | yes |  | 136 | no |
| 54 | no |  | 137 | no |
| 55 | yes |  | 138 | no |
| 56 | no |  | 139 | yes |
| 57 | yes |  | 140 | yes |
| 58 | yes |  | 141 | no |
| 59 | no |  | 142 | yes |
| 60 | no |  | 143 | no |
| 61 | no |  | 144 | yes |
| 62 | no |  | 145 | no |
| 63 | yes |  | 146 | no |
| 64 | yes |  | 147 | yes |
| 65 | no |  | 148 | yes |
| 66 | no |  | 149 | no |
| 67 | yes |  | 150 | no |
| 68 | yes |  | 151 | no |
| 69 | no |  | 152 | no |
| 70 | yes |  | 153 | yes |
| 71 | no |  | 154 | yes |
| 72 | yes |  | 155 | no |
| 73 | no |  | 156 | no |
| 74 | no |  | 157 | yes |
| 75 | yes |  | 158 | yes |
| 76 | no |  | 159 | no |
| 77 | no |  | 160 | yes |
| 78 | no |  | 161 | no |
| 79 | yes |  | 162 | yes |
| 80 | no |  | 163 | no |
| 81 | no |  | 164 | no |
| 82 | yes |  |  |  |
| 83 | no |  |  |  |

**Table S2.** Participants description according to disease status

| Variable | Control  N=97 | Case  N=67 | p |
| --- | --- | --- | --- |
| Age, years | 18.1 (2.9) | 20.7 (5.5) | 0.002 |
| Ethnicity  Afro Caribbean  Mixed  White Hispanic | 5 (5.2)  83 (86.5)  8 (8.3) | 6 (9.2)  44 (67.7)  15 (23.1) | 0.014 |
| Recruitment city  Bogotá  Bucaramanga  Cali  Cartagena  Cúcuta  Medellín  Popayán  Tunja | 1 (1.0)  11 (11.3)  3 (3.1)  63 (64.9)  2 (2.1)  16 (16.5)  -  1 (1.0) | 3 (4.5)  5 (7.5)  4 (5.9)  26 (38.8)  2 (2.9)  22 (32.8)  3 (4.5)  2 (2.9) | 0.005 |
| Recruitment year  2008  2009  2010  2011 | 42 (43.3)  38 (39.2)  4 (4.1)  13 (13.4) | 39 (58.2)  18 (26.9)  1 (1.5)  9 (13.4) | 0.227 |
| Prenatal care | 90 (92.8) | 64 (95.5) | 0.471 |
| SBP, mmHg | 110.3 (9.1) | 148.3 (9.5) | <0.001 |
| DBP, mmHg | 69.7 (7.4) | 96.3 (8.2) | <0.001 |
| Maternal gestational age, weeks | 39.1 (1.2) | 35.5 (3.8) | <0.001 |

SBP: Systolic blood pressure. DBP: Diastolic blood pressure.

*The file form .txt of both cases and controls was labelled according to the list below, and the MALDI-TOF mass spectra acquired for each sample are attached. Data are available on: <https://github.com/YAPrada/MALDI-Data-Preeclampsia>.

*The codes are available to public access as a notebook on: <https://github.com/Lauracmaca/MODELO-PE-MALDI-TOF>
